# Supplementary material for: Screening of Virulence-Related Transcriptional Regulators in Streptococcus suis
Source: MDPI journal article supplement (doi:10.3390/genes11090972), 2020-08-21

A The Most Enriched GO Terms (comRvsWT)

GO term

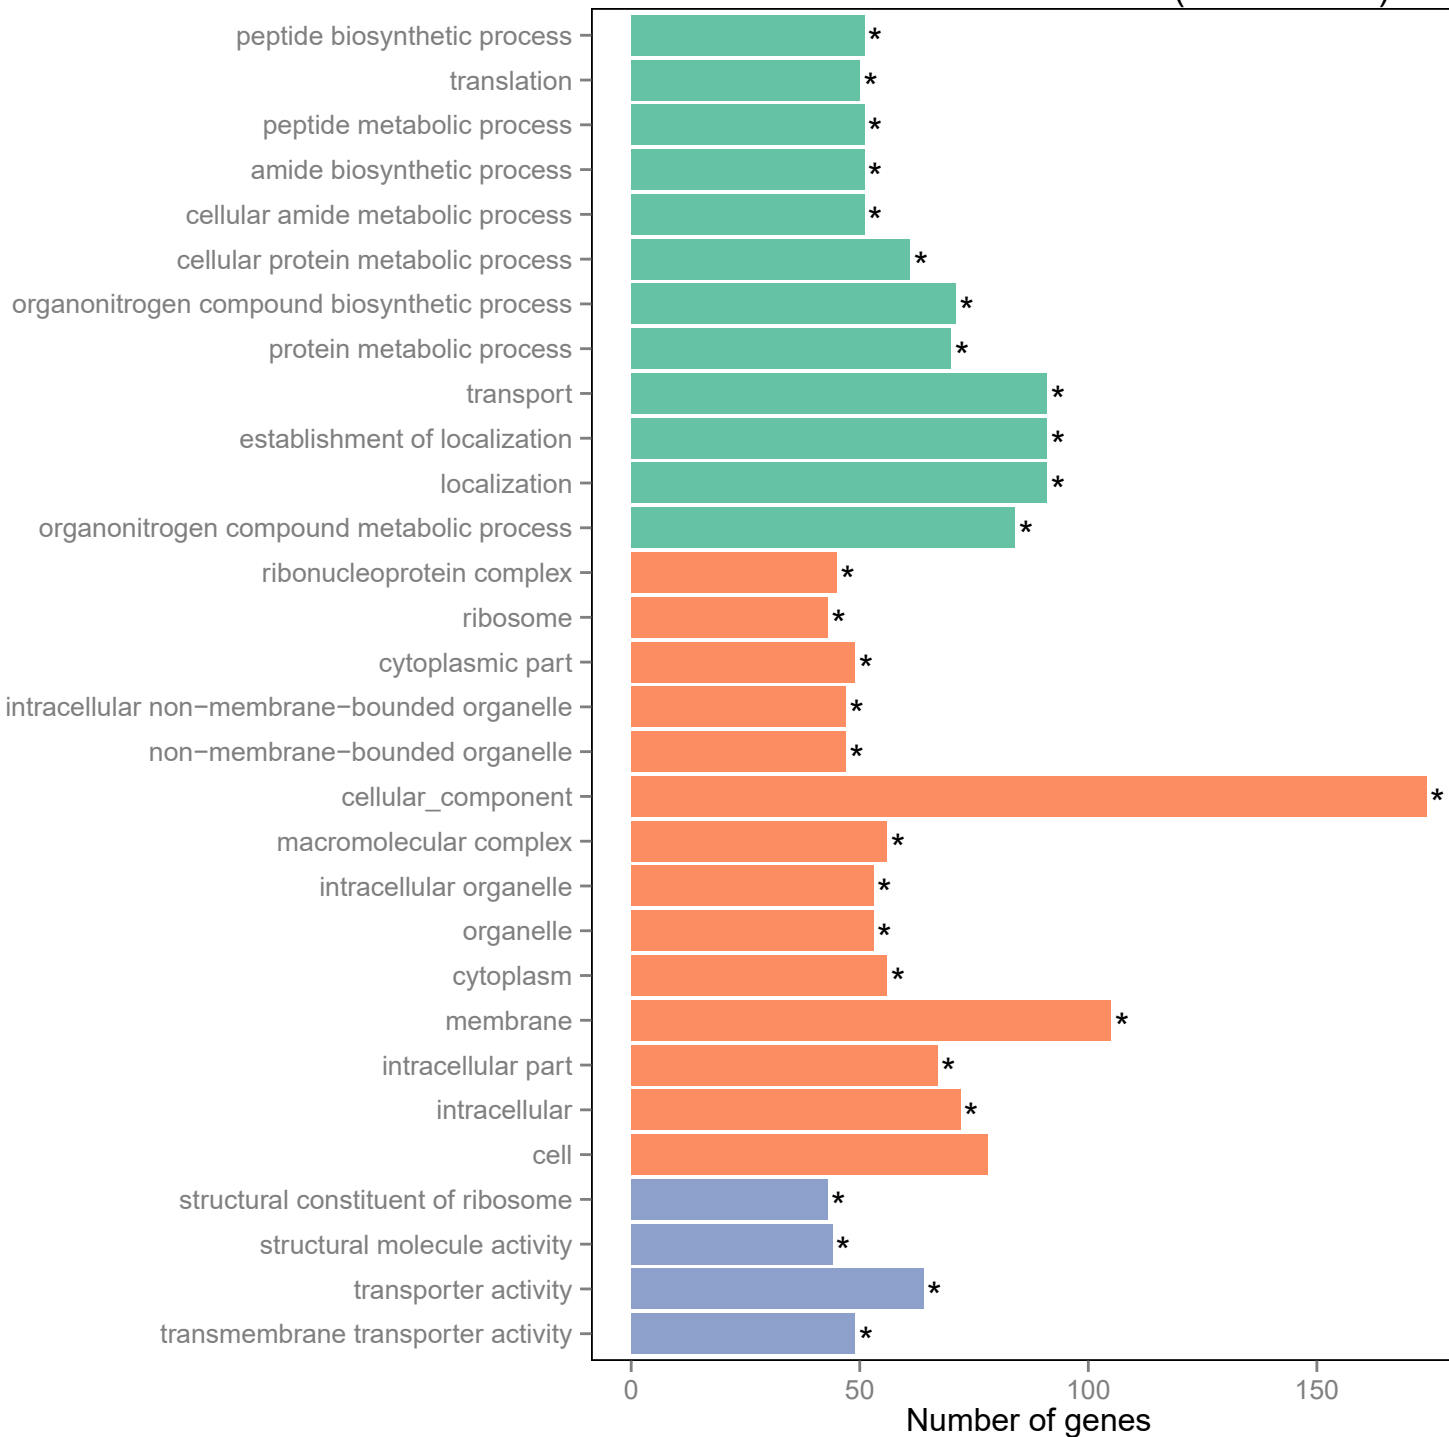

## B The Most Enriched GO Terms (sitRvsWT)

GO term

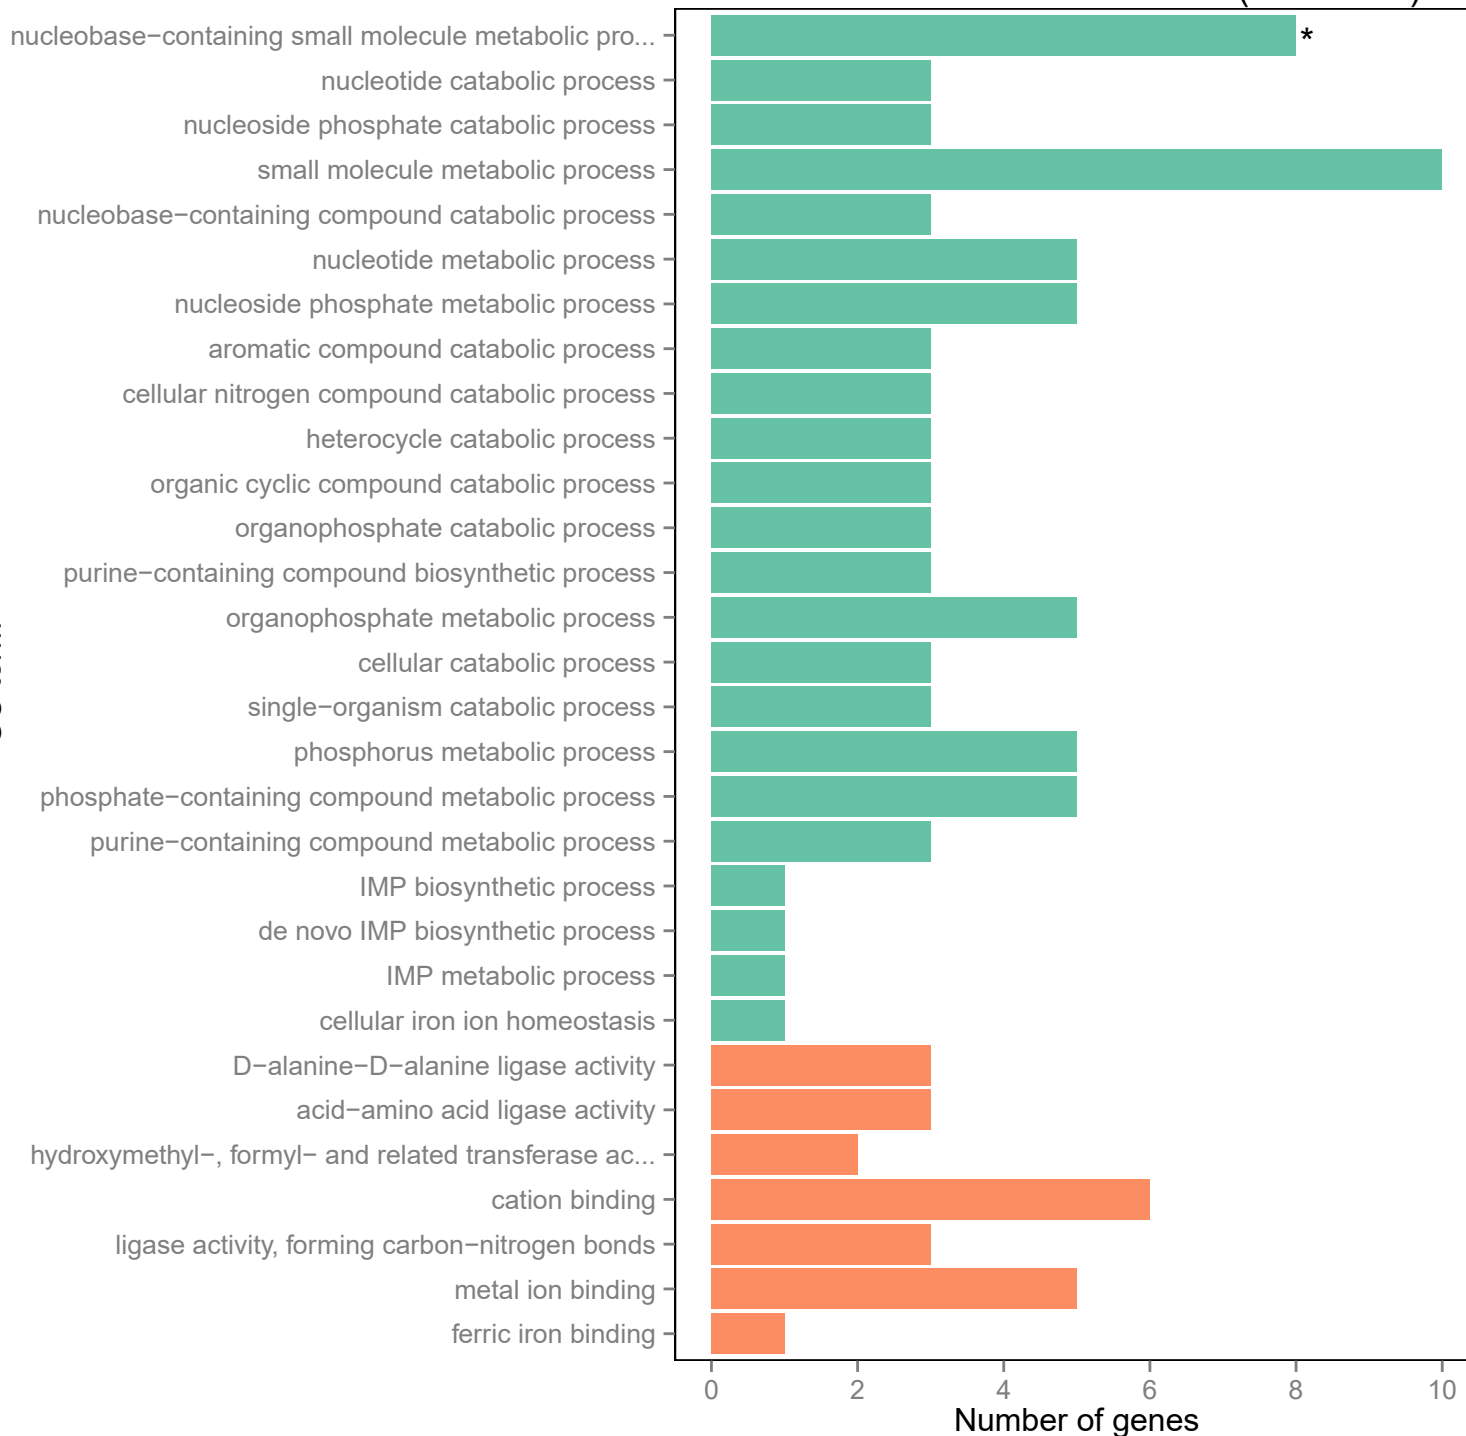

type

biological\_process  
molecular\_function

C The Most Enriched GO Terms (sxvRvsWT)

GO term

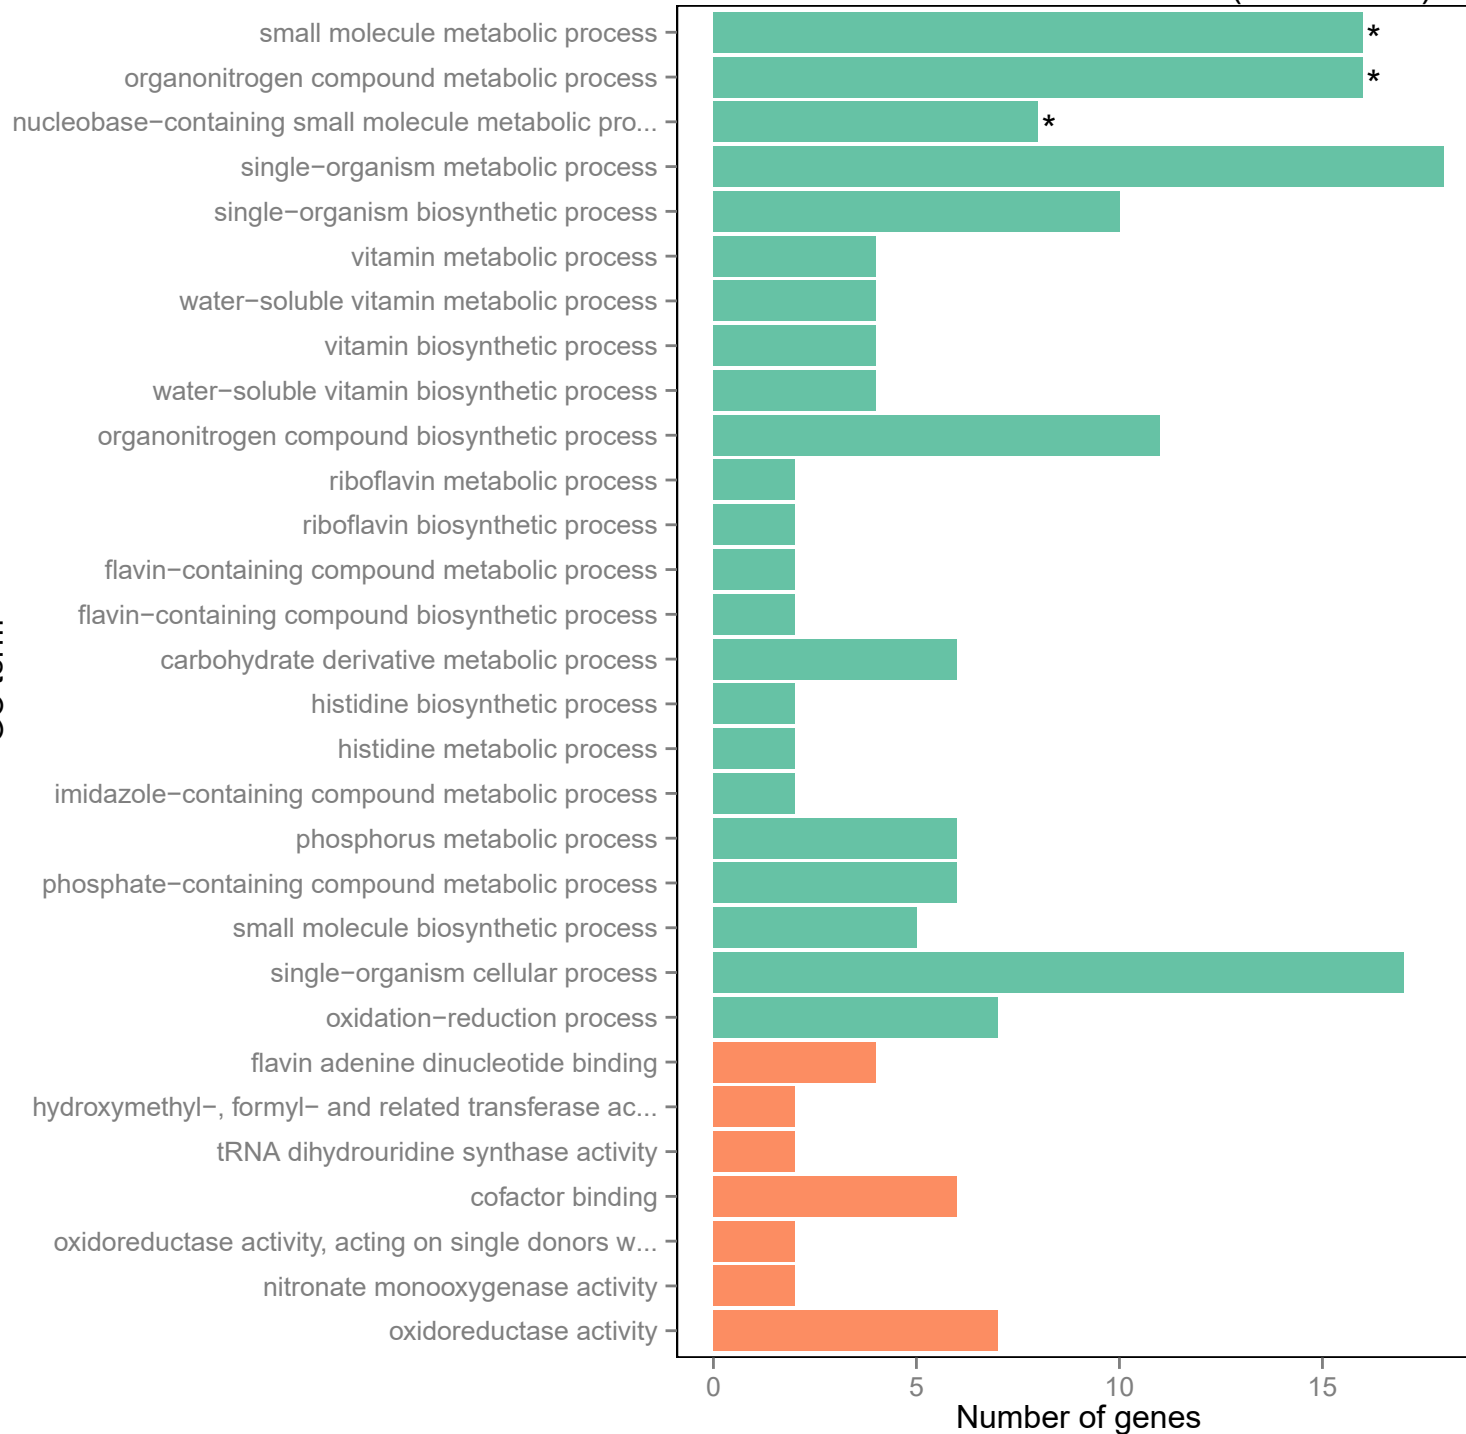

Supplement: s1 [file s1]
