# Supplementary material for: Screening of Virulence-Related Transcriptional Regulators in Streptococcus suis
Source: Genes (Basel). 2020 Aug 21;11(9):972. doi: 10.3390/genes11090972 (PMC7564649; doi:10.3390/genes11090972)
Supplement: Supplementary file 1 [file genes-11-00972-s001.zip]

Archive with 9 entries (9 files):
- Figure S1.tif
- Figure S2.jpg
- Figure S3.jpg
- Figure S4.jpg
- Figure S5.pdf
- Table S1.docx
- Table S2.xlsx
- Table S3.docx
- Table S4.xlsx
