# Supplementary material for: Screening of Virulence-Related Transcriptional Regulators in Streptococcus suis
Source: Genes (Basel). 2020 Aug 21;11(9):972. doi: 10.3390/genes11090972 (PMC7564649; doi:10.3390/genes11090972)
Supplement: Supplementary file 1 [file genes-11-00972-s001.zip › Table S2.xlsx]

## Sheet: Sheet1
Table S2 |Oligonucleotide primers used in this study
Primers	Primers sequence(5’-3’)	Functions or PCR product
0005rt-1	AGATGAGTTGGCAGAG
0005rt-2	GTAAGAGGTCGTTTGG
0046rt-1	TCGTTTAGGTATGGGACT
0046rt-2	TCATCATGGCATCTCG
0059rt-1	CGAAGGAAGCCATTAC
0059rt-2	ACGTGGGTTAGAGGTA
0064rt-1	CGGTTTGTTTGAAGGT
0064rt-2	TCATGGAGGAGACGAT
0107rt-1	CGAATACGCAGGAGCA
0107rt-2	AACCGCCACCAATAAC
0111rt-1	TTGTTGGGAGGTGAAT
0111rt-2	CAGCGGATAATAGTGGT
0149rt-1	CGTCGCTTGTATTCTC
0149rt-2	GTCCCTGACGACTGAA
0156rt-1	GAGATGTTCATTTGCTCCTT
0156rt-2	CTGCCTCATTGACTGTTCG
0170rt-1	TAATGAGGTAGGGATG
0170rt-2	TCTGAGATGGGTTTGA
0184rt-1	GCGTGGTATTGGAGGT
0184rt-2	GGAAGGATTCGGTTGC
0189rt-1	TCACAAGAAGGTCCGTTTA
0189rt-2	GTTCGCCAGAGCAGTT
0207rt-1	GGTAAGGTCTCCGTTGT
0207rt-2	CGATTGGTCGGCTCTA
0275rt-1	ATGCTCATCAGGGTATT
0275rt-2	GACAAGGTCCTCAAAGA
0285rt-1	TATTCGCCTATTTCAGA
0285rt-2	CAGATTCGGGTTACTT
0215rt-1	GCAGAGGGAATTTGTG
0215rt-2	ACCTGTAAGCGTTGTG
0230rt-1	GATGCTGCTGTATTCT
0230rt-2	TTTCTGCCCTACTGAC
0234rt-1	TGCCGTTTATCGTGTT
0234rt-2	GAGTCCGCCCTCTATC
0267rt-1	GTGGCGGAACATAGAG
0267rt-2	AATAGGATGCGGCTGA
0278rt-1	ATCATTGGTCCGTTTC
0278rt-2	GTCGTTGCCTACATTA
0291rt-1	CAGGGCTTTCCTTACA
0291rt-2	TGACTGCCAACCATTT
0307rt-1	AAACGGGCTGACAACG
0307rt-2	CGCACGACGACGGATA
0315rt-1	GGCGTTGGACTTGTTA
0315rt-2	GCAGTGCCAGATAGAAT
0332rt-1	ATGCAGCTTATGATAGA
0332rt-2	CCTGGAAAGCCAACAA
0341rt-1	TATTCCAACCGCTCAC
0341rt-2	CACCAAATTCAGACCC
0345rt-1	CTCAATCGCTCCATAC
0345rt-2	AACGGAGACAACCTACT
0373rt-1	GTGATGGCGAGGAAGG
0373rt-2	TAGGAGGTCAGGATGACAAT
0385rt-1	CGCAGCATTTACAACT
0385rt-2	ATACCGAAGCAGGAAC
0386rt-1	CATCACTTCACCGCTAG
0386rt-2	AACGCTTCAAACTGGAC
0439rt-1	CGCAGCATTTACAACT
0439rt-2	ATACCGAAGCAGGAAC
0476rt-1	GGCTAAATGTAGGCGAGTT
0476rt-2	TTGCTGGCGTCAATCC
0496rt-1	AAGTCCGTTCGTAGTAGTCT
0496rt-2	TTCGGTATCTGAATTGGT
0498rt-1	GCCAAGGTTTCCATTT
0498rt-2	TATCACCAGCAAGAGG
0500rt-1	TAAGCAGGTGAGTGGA
0500rt-2	AATCTCGTGGAGTAGTT
0541rt-1	ATCAAGGAAGCACGAC
0541rt-2	GAGGCACTCTACAACAAA
0554rt-1	GCGTTCCAAGGCATCA
0554rt-2	ACCGTTTCCCGTGTCG
0562rt-1	CAGACGGTCGCTACAA
0562rt-2	CTACTCGCTGGGAAAA
0628rt-1	TTGGGTGGTGAGTTTC
0628rt-2	CATAGCCGTCAGTTCC
0629rt-1	AAACAGCACCGATGAG
0629rt-2	CATACGATGATTCCCTA
0654rt-1	AAACAGCACCGATGAG
0654rt-2	CATACGATGATTCCCTA
0695rt-1	CTGGTTCGGGCTATCT
0695rt-2	ATGCCTGCATGGTTTC
0700rt-1	ACTATGAAACGGGCAATC
0700rt-2	CTCACCCAACGGAACG
0729rt-1	GCAGTGAGGCTGGTTG
0729rt-2	TTGATGGTCGCTTCTT
0780rt-1	GGCACGACTTCCTTTA
0780rt-2	TGCTGGCAACCTCATA
0790rt-1	AAAATGGCTTGGAGAC
0790rt-2	TTTATTGGACGACAGAA
0804rt-1	CAAAGGACTGCCCACT	In vivo induced qRT-PCR
0804rt-2	TTCGCACAGCAATCAG
0809rt-1	TTTAGGCGGTAGGGAG
0809rt-2	TACGGATTATTTACTTGGAC
0811rt-1	TGACTCCGACGGGTAT
0811rt-2	CATTGACAAAGCGAGA
0849rt-1	CTATTCCAAAGCCATCC
0849rt-2	TAGCCTTAACTATACATCAG
0874rt-1	ACCCAGAATGGAGACT
0874rt-2	GAAACGGAATGAATGT
0915rt-1	GCAGAAACAGGCAGTA
0915rt-2	AATTTGACGAGCGTAG
0985rt-1	AGACTTTCCTTGGCTGTT
0985rt-2	TTTGCGGATGTTATGC
0997rt-1	GTCATCTGTCCCATTT
0997rt-2	TTGTCACCGAGTTGTA
1014rt-1	TCCTACGGCTATGAAA
1014rt-2	TTGGGTATAGGTGGTG
1019rt-1	TGATAGCTTGGTGGTG
1019rt-2	AGCGGCTTCAGATAGA
1043rt-1	TCTCAGCCAGCATACA
1043rt-2	CTCGGACGAAGACATT
1072rt-1	CGTTGCCATAATAAGC
1072rt-2	CAATCTACCAGCCCTA
1085rt-1	ATCCTTGTTGCCTGAC
1085rt-2	GGGCGTTACCTTTAGT
1104rt-1	CCTCGTTCAATCAAGC
1104rt-2	GCAAAGTTGGCAGAAG
1206rt-1	GAACCCGTCGTCTCAG
1206rt-2	GGTGGGCACAATAAAA
1224rt-1	AAACGCATCAGGCAGAA
1224rt-2	CGGGCTTGAAATAGGG
1261rt-1	AGCAAGCGTGTCTATT
1261rt-2	CAGGCAACTATCATCC
1356rt-1	AAATGCTGCTTGGTAA
1356rt-2	TGGAAGAGTTGGCGTA
1374rt-1	ATAGTTGCCCTGCTCT
1374rt-2	ATGCTACTAACGGAAGAC
1375rt-1	GTAGGGTATTTGTTGG
1375rt-2	ATACCGTTTAGCAGAG
1404rt-1	AAATGCTGCTTGGTAA
1404rt-2	TGGAAGAGTTGGCGTA
1416rt-1	GAAACTGTTGCTCCTG
1416rt-2	TTCTGCTCCTATTCGT
1433rt-1	CCATCTTGGGTAATCG
1433rt-2	GAACTGCCTATCCTCT
1439rt-1	GCAGGCGAGCGATGTT
1439rt-2	ATGGCAAGGAAGTGGTCAG
1445rt-1	TGTTCCTCCTGACTGA
1445rt-2	AGATAAGCGACATAAGA
1455rt-1	AGGCTAAGACCGATACGA
1455rt-2	AAATGGACGCCAACAA
1473rt-1	AGGAATCCGTGGGTCA
1473rt-2	CGGCTACTGGTCGTCA
1500rt-1	GTGACGGCAATTTCTT
1500rt-2	TAAACGACGTGGGAAA
1522rt-1	CCCGTCAGACAGGTGGA
1522rt-2	CAGGGCGGAAGGAGTA
1566rt-1	AGGCTCTGGGCTATTC
1566rt-2	CGTGGTCGTGACTTTAT
1633rt-1	GAACGAATACGCTCAA
1633rt-2	CTCCGAGTGATGTTGC
1645rt-1	TTCCATTCCCATTGTC
1645rt-2	AACTTCGGCTTTGTTC
1678rt-1	AGGGAAGCCAAGAGTA
1678rt-2	GATTGCAGAAGCGAAT
1726rt-1	CCGTATGGTCATCGTC
1726rt-2	ATGGGCTACTGTCGTG
1749rt-1	GGGCATCAGGTATTGT
1749rt-2	TGCTAAGTCACCGTTT
1787rt-1	AAAGACGGATACCAGAGG
1787rt-2	CGTGTCGGGCTATAAAA
1789rt-1	CGTCATCAACTGCTCGTC
1789rt-2	TTGGGCGGATTACCTT
1848rt-1	TGATTGCCCACCTGTT
1848rt-2	CCAAGTCCTTCCCTCT
1872rt-1	GAATCGGCTGCTTCAT
1872rt-2	ATCGTCTCGCTCTTGG
1881rt-1	TGACGGATAGCAGGTT
1881rt-2	TACGCTTCATTCCATTT
1892rt-1	GAACGCTACCAGACAC
1892rt-2	GTTAGTAAATCACCGACA
1896rt-1	TCTTTAGCGATTTCCA
1896rt-2	TCAGCAGAGCAGGTTA
1937rt-1	CCAGATGACTCGGATGT
1937rt-2	GTCGGGCTTGGAATAG
1948rt-1	ATGTCGCTATTCAGGG
1948rt-2	TTTACGGTGGACTGCT
1963rt-1	CAACAGCATCCAGCAC
1963rt-2	AGGCACCTTAGACAAT
SSUSC84_0170L1	CGCGGATCCTAAGATGCTTTTGAGGTTT	Upstream border of SSUSC84_0170
SSUSC84_0170L2	ATTCTTTGGTGCCGACAAGTATTTTCCTCCTTGTCTTAAT
SSUSC84_0170R1	ACTTGTCGGCACCAAAGAATTCGCCGACGTACAACATTTAT	Downstream border of SSUSC84_0170
SSUSC84_0170R2	CATGCATGCCAACCAGTAACCAAGTGC
SSUSC84_0275L1	CGCGGATCC TTTAGGAAAGAGGAGAAGAT	Upstream border of SSUSC84_0275
SSUSC84_0275L2	AGAACAGCGAGTTTATCTGAGAGTTACATCGAAAAAACAG
SSUSC84_0275R1	TCAGATAAACTCGCTGTTCTCGGTTTCAAGTTGTTGCCCCT	Downstream border of SSUSC84_0275
SSUSC84_0275R2	CCCAAGCTTGGGGCATCATCAAGCAGAAC
SSUSC84_0315L1	CGCGGATCCTGAAGGAAATGCCCAAGG	Upstream border of SSUSC84_0315
SSUSC84_0315L2	CCCGCGACCGCATTTTCAACAAGTGCATAAGAAAACCCGA
SSUSC84_0315R1	GTTGAAAATGCGGTCGCGGGTTTCTTGGCTGACGGATAGG	Downstream border of SSUSC84_0315
SSUSC84_0315R2	CATGCATGCGGGCACGCTTGATACG
SSUSC84_0046L1	CGCGGATCCCGGAACGCTGTTGGAT	Upstream border of SSUSC84_0046
SSUSC84_0046L2	ATATCATGCTCTTCTTAAAACAGACGGTTGGACTCATT
SSUSC84_0046R1	TTTTAAGAAGAGCATGATATAATTGATAGAAAATAGAGAG	Downstream border of SSUSC84_0046
SSUSC84_0046R2	CCGCTCGAGATTGACTGAGAAAATCGTG
SSUSC84_0874L1	CCGGAATTCATCCATTGGGCTATCTTC	Upstream border of SSUSC84_0874
SSUSC84_0874L2	TGTTAGCTTAGCTTTATTTCTAGTCTTGTCAAATATA
SSUSC84_0874R1	TAAAGCTAAGCTAACAGCACTCTGTCATAAAATATC	Downstream border of SSUSC84_0874
SSUSC84_0874R2	CCCAAGCTTGACGAATCATCTCCTCAA
SSUSC84_1645L1	CCGGAATTCAGATTGGTCAGAGTTTCGTT	Upstream border of SSUSC84_1645
SSUSC84_1645L2	TTTATTAGGTACAGCTTTTTTCAGTTAGTTTTGCGACCAT
SSUSC84_1645R1	AAAAAGCTGTACCTAATAAAAATTAGGTGCAGCTTTTTTG	Downstream border of SSUSC84_1645
SSUSC84_1645R2	CCCAAGCTTTGAAACTGACGAGGAAGG
SSUSC84_1787L1	CCGGAATTCGAAAATCCATTGCTCACG	Upstream border of SSUSC84_1787
SSUSC84_1787L2	AAACAATAAAAAGGTAGATTCAGAAAATTATGCCAAGGCT
SSUSC84_1787R1	AATCTACCTTTTTATTGTTTTTTATATTTTATATCCTACTC	Downstream border of SSUSC84_1787
SSUSC84_1787R2	CATGCATGCCGATTGGTTCCTTTATGT
SSUSC84_0005L1	TCCCCCGGGGTCTACCGTTTGCTTA	Upstream border of SSUSC84_0005
SSUSC84_0005L2	AATAAATAATCCACCTAAAAGATCATTTCCTCCTCT
SSUSC84_0005R1	TTTTAGGTGGATTATTTATTAAGCATTATTTTTAAGAAGC	Downstream border of SSUSC84_0005
SSUSC84_0005R2	CATGCATGCACGGGTTTAGTGGTCAAGAG
SSUSC84_0111L1	CCGGAATTCCTTGAAAGTTTGACGGATGA	Upstream border of SSUSC84_0111
SSUSC84_0111L2	CCACAGGAGCTTTACACTCATAATTTTCTAACTTCAGTTTA
SSUSC84_0111R1	TGAGTGTAAAGCTCCTGTGGAGCTTTACAGCCTACTACCT	Downstream border of SSUSC84_0111
SSUSC84_0111R2	CCCAAGCTTCGCTATGAACTATCGGACT
SSUSC84_0756L1	CCGGAATTCTTGTTTCTAATCCGCCCTAT	Upstream border of SSUSC84_0756
SSUSC84_0756L2	CGGTACTCCTTTGTATTGGGTCATAAAACTACCTCAAATTC
SSUSC84_0756R1	CCCAATACAAAGGAGTACCGTATATGATTTTTGACAAAGT	Downstream border of SSUSC84_0756
SSUSC84_0756R2	CCCAAGCTTTTGGATGCCTGGGAAGAT
P1	TGGAAATGTTCAAGTCAACC	For PCR to detect the gdh
P2	CGTTTTTCTTTGATGTCCAC
P3	CGTCGTATCTGAACCATTG	For PCR to detect the pSET4s
P4	TGGAGAAGATTCAGCCACT
0170-1	CTTAGAAGGTGAGAGCGGA	For PCR to detect SSUSC84_0170
0170-2	CAAACGAGATGTTAAACGG
0275-1	TTGAAACCGAGAACAGCG	For PCR to detect SSUSC84_0275
0275-2	TCACTCTTCCACATATTCCA
0315-1	GCTACACCAAGCACATCAA	For PCR to detect SSUSC84_0315
0315-2	AGCGTATCAGAGTCCACAA
0046-1	ATTATGTATCTTTACCCGAA	For PCR to detect SSUSC84_0046
0046-2	GCATCTATTGCTATCTTCTC
0874-1	CCGTTTTAATACTCCTCCA	For PCR to detect SSUSC84_0874
0874-2	CTTACCTCGTTTCCCATAG
1645-1	TCCATTCCCATTGTCTCTT	For PCR to detect SSUSC84_0645
1645-2	CGGATTTCCATCTCCTTAC
1787-1	GTGCGTGATGATGAGTTGA	For PCR to detect SSUSC84_1787
1787-2	CATAAGAGCCTGTCGGTAG
C0046-1	TTGTAAAACGACGGCCAGTGAATTCGCCGTCGTTTTACAACGTCGTG	For PCR to construct complementary strains
C0046-2	CCAAGCTTGCATGCCTGCAGGCTCGATGTAGAAACAGCTGTC
C0874-1	TTGTAAAACGACGGCCAGTGAATTCGGTTTGGCTGTTCTTCTGGT
C0874-2	CCAAGCTTGCATGCCTGCAGTCATACTAGGACCTCCAGAG
C1787-1	TTGTAAAACGACGGCCAGTGAATTCACTTCGTCGCCTCCTCCAAACC
C1787-2	CCAAGCTTGCATGCCTGCAGCTAAAATTCCTGATAGATAGCATCG
Pset2-1	CTGCAGGCATGCAAGCTTGG
Pset2-2	GAATTCACTGGCCGTCGTTTTACAA
0027-F	CGTGGACAAGAAGGAG
0027-R	TAGGAAGGGCTGGATA
0029-F	TACGAAGAAGCCATTAT
0029-R	CTCGGACTTGTTTGAT
0031-F	AGCCCAGGACCACAAG
0031-R	GCACGCCCAGATAAGA
0275-F	TAGACAAGGTCCTCAAAG
0275-R	ATGCTCATCAGGGTATT
0504-F	TTCGCACTTTCAAGAC
0504-R	TTTCCCATAGTTCAGC
0505-F	ATGGTCACGAGGTTGG
0505-R	TTTCGCTCCTTCTTCC
0506-F	TATCAGTCCGATGCTC
0506-R	CTACTCGCCACTCTTC
0507-F	GAAATGGCTGTTCGTG
0507-R	TTTGATGGATTGGGAT
0509-F	GGAATACGCAGAGCAA
0509-R	AGTAACCCTCCCGACA
0510-F	TTCTATCATCGTCCCA
0510-R	TACCGTCATTCACCAG
0517-F	GGTATGGCTGTTATGG
0517-R	GTTGGATACTCGGTTG
0518-F	GATGGTAGCCAGTGTT	For qRT-PCR assay to validate
0518-R	GAAGCGAAGTAAAGATGTA
0520-F	TCTGTTAGCCTTGTTAC
0520-R	TTTCTTTATCGGAGTAG
0648-F	CTTGGCTGTTGGTTTC
0648-R	CCAGTAGCGTTGTCGT
0875-F	GTGAAGCAGCAACTCA
0875-R	CTGTCGCAATATCCAA
0900-F	TTTGTCATCAGCCTATT
0900-R	AAAGACCACCAACCAG
1526-F	TATCAGTAGCCCATTCA
1526-R	AACGCTCACTCATCTC
1572-F	GGCGGTCTTCACTACAA
1572-R	GAACCACCTGCTCCAA
1782-F	AACAAACATCGCTCAG
1782-R	TCAGTTACGGTAAAGGT
1785-F	TTGCTGATTCGTCGTG
1785-R	CGGAAACCGTTAGGAG
1876-F	ATAGTCCGACAGTATCAGC
1876-R	ACCCAAGGAGCCATTT
1927-F	ATAAAGCAGGACGACA
1927-R	TATCACTCCCAACTCAC
gapdh-F	CCCGTAGACAAAATGGTGAAG
gapdh-R	GACTGTGCCGTTGAATTTG
Underlined nucleotides denote enzyme restriction sites.
Double underline nucleotides denote overlapping sequence
