# Supplementary material for: Screening of Virulence-Related Transcriptional Regulators in Streptococcus suis
Source: Genes (Basel). 2020 Aug 21;11(9):972. doi: 10.3390/genes11090972 (PMC7564649; doi:10.3390/genes11090972)
Supplement: Supplementary file 1 [file genes-11-00972-s001.zip › Table S4.xlsx]

## Sheet: Sheet1
Table S4 | Virulence-Associated(VFG) genes in △comR, △sitR and △sxvR indentified by RNAseq
	Gene_id	foldchange(log2)	padj	Description	Putative or confirmed function in virulence	VFG number
△comR VS WT
	SSUSC84_1872	-3.57	3.61e-171	LacI family regulatory protein	EFAU085_00344	VFG045671(gi:529233057)
	SSUSC84_0412	-3.0075	9.57e-161	sortase SrtC1	srtC	VFG043009(gi:77408623)
	SSUSC84_0710	-2.9547	1.45e-272	ABC transporter%2C ATP-binding/permease protein	msbA	VFG013253(gi:113461164)
	SSUSC84_0954	-2.8806	2.78e-61	ABC transporter ATP-binding membrane protein	msbA	VFG013249(gi:68248611)
	SSUSC84_0709	-2.7064	1.67e-215	ABC transporter%2C ATP-binding/permease protein	msbA	VFG013249(gi:68248611)
	SSUSC84_1123	-2.6756	1.29e-103	ABC transporter ATP-binding protein	bauE	VFG037392(gi:469822557)
	SSUSC84_1125	-2.5407	3.64e-100	putative lipoprotein	btrV	VFG042071(gi:33593231)
	SSUSC84_0955	-2.5402	1.05e-102	ABC transporter ATP-binding membrane protein	rtxE	VFG038918(gi:117620955)
	SSUSC84_1873	-2.3498	0	putative glutamine transporter%2C ATP-binding protein 5	fbpC	VFG006259(gi:59800668)
	SSUSC84_0274	-2.3391	1.54e-11	transport system membrane protein	YPA_2067	VFG002901(gi:108808062)
	SSUSC84_1502	-2.3267	0	serum opacity factor pseudogene	ofs	VFG043468(gi:146321521)
	SSUSC84_0411	-2.2457	1.79e-65	major pilus subunit	SAN_1518	VFG043008(gi:77408651)
	SSUSC84_1874	-2.2435	0	putative amino-acid ABC transporter permease protein	YPA_2067	VFG002901(gi:108808062)
	SSUSC84_1906	-2.2098	9.98e-179	major pilus subunit pseudogene	SAG1407	VFG005298(gi:22537554)
	SSUSC84_1905	-2.0909	3.42e-172	putative accessory pilus subunit	rrgC	VFG005305(gb|NP_344984)
	SSUSC84_0728	-2.0599	2.6e-67	putative histidinol-phosphate aminotransferase	qbsB	VFG044377(gi:28192387)
	SSUSC84_1907	-2.0237	3.44e-236	putative accessory pilus subunit	cpbA	VFG018651(gi:157151048)
	SSUSC84_0856	-1.963	6.81e-94	lantibiotic modifying enzyme pseudogene	cylM	VFG002169(gi:29375151)
	SSUSC84_1601	-1.9247	3.5e-142	putative D-methionine transport ATP-binding protein	fbpC	VFG036559(gi:313668880)
	SSUSC84_1126	-1.8864	4.71e-71	putative lipoprotein	btrV	VFG042071(gi:33593231)
	SSUSC84_0243	-1.8542	3.91e-220	putative surface-anchored protein pseudogene	fhaB	VFG010927(gi:33597569)
	SSUSC84_0520	-1.7595	1.67e-254	N-acylneuraminate cytidylyltransferase	neuA	VFG006050(gi:146318235)
	SSUSC84_0516	-1.73	2.52e-242	putative exopolysaccharide biosynthesis protein	SSU05_0577	VFG006018(gi:146318231)
	SSUSC84_0519	-1.7006	1.87e-202	putative transferase	SSU05_0580	VFG006044(gi:146318234)
	SSUSC84_0577	-1.6922	1.45e-63	ferrichrome transport permease	fagA	VFG044214(gi:47778324)
	SSUSC84_0518	-1.6449	2.71e-214	putative UDP-N-acetylglucosamine 2-epimerase	neuC	VFG006037(gi:146318233)
	SSUSC84_0517	-1.5933	3.35e-195	putative N-acetylneuraminic acid synthase	neuB	VFG006028(gi:146318232)
	SSUSC84_0515	-1.5777	6.86e-187	putative lipooligosaccharide sialyltransferase	SSU98_0580	VFG006019(gi:146320427)
	SSUSC84_0410	-1.4816	1.22e-44	accessory pilus subunit pseudogene	inlA	VFG043007(gi:77408644)
	SSUSC84_0578	-1.4716	6.04e-49	ferrichrome transport permease	cbrB	VFG016168(gi:66045827)
	SSUSC84_0855	-1.4576	1.2e-14	lantibiotic transport protein	cylB	VFG002176(gb|AAM75252)
	SSUSC84_1228	-1.4533	3.81e-27	putative amino acid ABC transporter%2C permease protein	YPA_2067	VFG002901(gi:108808062)
	SSUSC84_1227	-1.4315	5.19e-33	putative amino acid ABC transporter%2C permease protein	YPA_2067	VFG002901(gi:108808062)
	SSUSC84_1145	-1.3904	5.42e-30	putative membrane protein	SSA_1515	VFG006017(gi:125718326)
	SSUSC84_1144	-1.3866	1.64e-105	putative glycosyl transferase	STER_1438	VFG006075(gi:116628177)
	SSUSC84_1335	-1.3751	5.74e-23	ABC transporter ATP-binding protein	hitC	VFG013192(gi:170717476)
	SSUSC84_1875	-1.3505	3.79e-157	putative amino-acid ABC transporter extracellular-binding protein	fliY	VFG043047(gi:16765292)
	SSUSC84_0257	-1.3397	5.88e-51	multi antimicrobial extrusion MATE	clbM	VFG043682(gi:112292707)
	SSUSC84_1255	-1.3361	1.3e-45	multi-drug resistance efflux pump	lbtB	VFG010861(gi:148358856)
	SSUSC84_0431	-1.3357	1.48e-28	putative glutamine transporter%2C ATP-binding protein 3	fbpC	VFG006259(gi:59800668)
	SSUSC84_1146	-1.3276	1.59e-86	putative glycosyl transferase	SSA_1516	VFG006027(gi:125718327)
	SSUSC84_1355	-1.2756	2.96e-39	haloacid dehalogenase-like hydrolase	CD0241	VFG043287(gi:126697812)
	SSUSC84_0929	-1.2346	2.57e-99	putative glutamine ABC transporter%2C ATP-binding protein 1	hitC	VFG013573(gi:113460924)
	SSUSC84_1151	-1.2324	2.83e-83	putative membrane protein	SSA_1512	VFG005982(gi:125718323)
	SSUSC84_1266	-1.2304	9.72e-73	ABC transporter ATP-binding membrane protein	msbA	VFG013149(gi:170717750)
	SSUSC84_1226	-1.2248	3.74e-30	putative glutamine-binding protein precursor	pebA	VFG011639(gi:118475479)
	SSUSC84_1147	-1.2115	7.72e-94	putative glycosyltransferase	SSA_1511	VFG005970(gi:125718322)
	SSUSC84_0509	-1.1937	4.04e-115	ptative glycosyltransferase	cps2J	VFG005971(gi:146318227)
	SSUSC84_0144	-1.1822	7.18e-126	elongation factor G EF-G	tuf	VFG016491(gi:26553484)
	SSUSC84_1901	-1.1783	5.23e-69	putative surface-anchored 2'%2C3'-cyclic-nucleotide 2'-phosphodiesterase	adsA	VFG002420(gb|NP_644838)
	SSUSC84_1149	-1.1722	2.12e-66	putative glycosyl transferase	rgpE	VFG006043(gi:125718329)
	SSUSC84_1667	-1.1684	2.18e-112	translation initiation factor IF-2	tuf	VFG016492(gi:15828876)
	SSUSC84_1148	-1.1631	1.51e-98	putative glycosyl transferase	rgpF	VFG005994(gi:125718324)
	SSUSC84_1150	-1.1625	1.32e-70	glycosyl transferase family protein	C8J_1342	VFG017985(gi:157415661)
	SSUSC84_0145	-1.1508	3.61e-117	putative endopeptidase	zmp1	VFG031084(gi:433644988)
	SSUSC84_0508	-1.1451	2.09e-105	oligosaccharide repeat unit polymerase	SSU05_0572	VFG005959(gi:146318226)
	SSUSC84_1278	-1.1418	2.76e-70	cation transporting ATPase	mgtB	VFG018402(gi:161505694)
	SSUSC84_0256	-1.1404	3.47e-50	ABC transporter ATP-binding protein	ciuD	VFG013728(gi:68536376)
	SSUSC84_0273	-1.1205	2.87e-06	extracellular solute-binding protein	bscS	VFG043099(gi:15802355)
	SSUSC84_0510	-1.0932	1.35e-96	putative glycosyl transferase	cps2K	VFG005983(gi:146318228)
	SSUSC84_0178	-1.0566	6.65e-97	putative surface-anchored protein	cba	VFG005803(gi:76787028)
	SSUSC84_1152	-1.0541	7.48e-64	putative exopolysaccharide biosynthesis protein	STER_1443	VFG006087(gi:116628182)
	SSUSC84_0928	-1.0525	1.8e-90	putative glutamine ABC transporter%2C glutamine-binding protein/permease protein	fliY	VFG043099(gi:15802355)
	SSUSC84_1158	-1.0372	2.29e-48	putative membrane protein	M3Q_302	VFG038161(gi:407930986)
	SSUSC84_0242	-1.0307	4.2e-92	putative surface-anchored protein	fhaB	VFG010927(gi:33597569)
	SSUSC84_1603	-1.0284	4.37e-49	putative lipoprotein	IlpA	VFG045346(gb|NP_933683)
	SSUSC84_1400	-1.0121	0.0029875	multiple sugar-binding transport system permease protein	sugB	VFG030646(gi:507420312)
	SSUSC84_1970	-1.0097	2.74e-23	ABC transporter ATP-binding protein	hitC	VFG000344(gb|NP_438273)
	SSUSC84_1743	-1.0056	7e-32	serine acetyltransferase	cysE	VFG016409(gi:49478936)
	SSUSC84_1760	-1.0034	6.98e-07	3-isopropylmalate dehydratase small subunit	leuD	VFG009377(gi:145224805)
	SSUSC84_0920	-0.98342	1.26e-13	putative extracellular amino acid-binding protein	fliY	VFG043099(gi:15802355)
	SSUSC84_0854	-0.97041	0.00091296	lantibiotic transport ATP-binding protein	ddrA	VFG023851(gi:387876451)
	SSUSC84_0409	-0.96272	1.07e-08	putative signal peptidase I 2	lep	VFG043006(gi:77408620)
	SSUSC84_0507	-0.96001	1.24e-79	putative membrane protein	cps2H	VFG005947(gi:146318225)
	SSUSC84_0989	-0.9561	1.82e-48	phosphate import ATP-binding protein 1	hitC	VFG013571(gi:68248710)
	SSUSC84_0250	-0.95532	4.44e-49	aldehyde-alcohol dehydrogenase [includes: alcohol dehydrogenase%3B acetaldehyde dehydrogenase]	lap	VFG006720(gi:116873066)
	SSUSC84_1911	-0.93821	2.7e-17	conserved hypothetical protein	lpg2936	VFG030565(gi:31793499)
	SSUSC84_1401	-0.93485	0.025103	multiple sugar-binding transport system permease protein	sugA	VFG030565(gi:31793499)
	SSUSC84_1052	-0.9229	3.39e-72	ATP synthase beta chain	cdsN	VFG016961(gi:16752333)
	SSUSC84_0506	-0.9129	7.24e-72	putative glycosyl transferase	cps2G	VFG005935(gi:146318224)
	SSUSC84_0901	-0.90327	1.82e-28	putative membrane protein	lpg2628	VFG045590(gb|YP_096633)
	SSUSC84_0990	-0.90311	7.78e-42	phosphate import ATP-binding protein 2	ciuD	VFG013728(gi:68536376)
	SSUSC84_1625	-0.89902	1.3e-67	3R-hydroxymyristoyl-[acyl carrier protein] dehydratase	fabZ	VFG011402(gi:23502030)
	SSUSC84_1902	-0.8977	1.98e-26	sortase SrtC3	srtC-3/srtD	VFG005310(gb|NP_344988)
	SSUSC84_1319	-0.89023	8.99e-27	ABC transporter ATP-binding protein	hmuV	VFG013716(gi:68535383)
	SSUSC84_1934	-0.8485	1.93e-08	putative maltose/maltodextrin ABC transport system permease protein	sugA	VFG030565(gi:31793499)
	SSUSC84_0430	-0.83672	4.63e-11	putative amino acid ABC transporter permease protein	YPA_2067	VFG002901(gi:108808062)
	SSUSC84_1749	-0.83227	0.011103	RpiR family regulatory protein	gmhA/lpcA	VFG013422(gi:33152324)
	SSUSC84_0406	-0.82269	1.21e-54	BipA family GTPase	tuf	VFG016485(gi:31544430)
	SSUSC84_1225	-0.81785	4.97e-26	putative glutamine transporter%2C ATP-binding protein 4	hitC	VFG013192(gi:170717476)
	SSUSC84_1391	-0.81665	1.43e-34	branched-chain amino acid transport ATP-binding protein	ddrA	VFG007915(gi:126435440)
	SSUSC84_1971	-0.81471	3.81e-24	ABC transporter ATP-binding protein	sugC	VFG030673(gi:15827534)
	SSUSC84_0487	-0.80324	1.67e-48	putative amino acid ABC transporter%2C extracellular amino acid-binding protein	fliY	VFG043047(gi:16765292)
	SSUSC84_1153	-0.79469	1.72e-45	rhamnan synthesis protein F family protein	rgpF	VFG006074(gi:55821450)
	SSUSC84_1887	-0.78925	1.25e-10	metal cation ABC transporter membrane protein	sitC	VFG012581(gi:26247466)
	SSUSC84_1627	-0.78328	1.12e-56	3-oxoacyl-[acyl-carrier-protein] synthase II	kasB	VFG009135(gi:383308045)
	SSUSC84_0505	-0.75585	4.52e-50	putative rhamnosyl transferase	cps2F	VFG005923(gi:146318223)
	SSUSC84_0557	-0.74836	2.73e-10	ornithine carbamoyltransferase	argK	VFG015903(gi:71735587)
	SSUSC84_0231	-0.73765	0.0058334	putative membrane protein	esaA	VFG018103(gi:156978612)
	SSUSC84_0539	-0.73684	8.9e-40	UDP-galactopyranose mutase	cpsI	VFG002182(gb|NP_816133)
	SSUSC84_0504	-0.7278	6.77e-47	putative galactosyl transferase	cps2E	VFG005924(gi:146320419)
	SSUSC84_0787	-0.72172	3.07e-06	tyrosine recombinase XerC	mrfI	VFG042630(gi:15042706)
	SSUSC84_1404	-0.71835	3.51e-06	AraC family regulatory protein	chpD	VFG014092(gi:152986357)
	SSUSC84_1813	-0.70833	2.36e-31	putative membrane protein	wcbQ	VFG026103(gi:170732103)
	SSUSC84_1154	-0.70009	1.1e-30	putative polysaccharide export system ATP-binding protein	rgpD	VFG005922(gi:125718318)
	SSUSC84_0327	-0.68542	3.11e-19	isochorismatase family protein pseudogene	ASA_3330	VFG044244(gi:145300217)
	SSUSC84_1628	-0.68358	7.91e-42	3-oxoacyl-[acyl-carrier protein] reductase	flmH	VFG038840(gi:507521851)
	SSUSC84_1267	-0.68172	4.43e-21	ABC transporter ATP-binding membrane protein	msbA	VFG013249(gi:68248611)
	SSUSC84_0272	-0.67067	4.54e-09	putative amidase	clbL	VFG043683(gi:112292708)
	SSUSC84_0736	-0.66732	2.39e-26	ABC transporter ATP-binding protein	chuC	VFG044077(gi:218563205)
	SSUSC84_1686	-0.64613	2.11e-30	oligopeptide transport ATP-binding protein OppF	oppF	VFG016532(gi:42561491)
	SSUSC84_1054	-0.64472	2.13e-35	ATP synthase alpha chain	yscN	VFG023720(gi:332163582)
	SSUSC84_0782	-0.64397	5.38e-12	signal recognition particle protein	flhF	VFG043311(gi:126697836)
	SSUSC84_0249	-0.63645	7.3e-05	alcohol dehydrogenase	adhD	VFG030295(gi:118619910)
	SSUSC84_0716	-0.6345	1.3e-15	putative spermidine/putrescine ABC transporter permease protein	hitB	VFG005776(gb|NP_687685)
	SSUSC84_0150	-0.63286	2.82e-11	putative glutamine synthetase	glnA1	VFG026433(gi:383308019)
	SSUSC84_1212	-0.6171	1.85e-24	peptide chain release factor 3	tuf	VFG016486(gi:54020567)
	SSUSC84_1593	-0.61491	1.71e-09	MATE family efflux protein	clbM	VFG043682(gi:112292707)
	SSUSC84_0486	-0.61315	6.49e-22	putative amino acid ABC transporter ATP-binding protein	fbpC	VFG036559(gi:313668880)
	SSUSC84_0149	-0.60845	9.82e-11	MerR family regulatory protein	hspR	VFG001379(gi:15607494)
	SSUSC84_1284	-0.6077	1.64e-23	RNA polymerase sigma factor RpoD	sigA/rpoV	VFG026980(gi:386005579)
	SSUSC84_1566	-0.59471	1.58e-17	response regulator protein	lisR	VFG006826(gi:16803417)
	SSUSC84_1629	-0.59081	4.13e-32	putative malonyl CoA-acyl carrier protein transacylase	pks15/1	VFG029280(gi:443490187)
	SSUSC84_1903	-0.58822	1.97e-10	sortase SrtC4	srtC4	VFG005294(gi:22537552)
	SSUSC84_0701	3.3133	0	aspartate carbamoyltransferase	argK	VFG015903(gi:71735587)
	SSUSC84_0295	3.205	4.27e-94		icaA	VFG017116(gi:148269099)
	SSUSC84_1929	3.1639	4.44e-22	putative choline binding protein	cbpD	VFG005320(gi:146319781)
	SSUSC84_0909	2.6677	0	glycosyl transferase	gtrB	VFG012939(gi:110804318)
	SSUSC84_0121	2.4587	0.0076478	putative competence protein	pilB	VFG042832(gi:18310826)
	SSUSC84_0836	2.2967	0.017036	FtsK/SpoIIIE family protein	eccC4	VFG022232(gi:118470570)
	SSUSC84_1526	2.1449	6.13e-271	Dps-like peroxide resistance protein Dpr	napA	VFG000307(gb|NP_207041)
	SSUSC84_0881	2.0453	3.84e-05	putative conjugal transfer protein TraG	lvhD4	VFG010804(gi:54296157)
	SSUSC84_0583	1.7293	0.0054899	putative competence protein	comE1	VFG043478(gi:15603530)
	SSUSC84_1525	1.7048	4.62e-15	ABC transporter ATP-binding protein	ddrA	VFG007915(gi:126435440)
	SSUSC84_0876	1.5819	7.53e-05	hypothetical protein	SE2319	VFG043453(gi:27469237)
	SSUSC84_0213	1.5253	1.38e-108	AMP-binding enzyme	entE	VFG030400(gi:333989012)
	SSUSC84_1085	1.2085	4.42e-75	LacI family regulatory protein	bopD	VFG002197(gb|NP_814691)
	SSUSC84_1778	1.1804	2.15e-61	undecaprenyl pyrophosphate synthetase	uppS	VFG045688(gi:383329042)
	SSUSC84_1224	1.1545	6.77e-59	response regulator protein	regX3	VFG031731(gi:126433265)
	SSUSC84_t0052	1.1483	0.04536	tRNA-Leu	EFAU085_00344
	SSUSC84_0931	1.1162	1.32e-18	ABC transporter%2C ATP-binding protein	hmuV	VFG013716(gi:68535383)
	SSUSC84_1396	1.1092	8.08e-85	putative ATP-dependent Clp protease proteolytic subunit	clpP	VFG000077(gb|NP_465991)
	SSUSC84_1545	1.0628	1.11e-71	pyridoxal-dependent decarboxylase	lysA	VFG009395(gi:119870001)
	SSUSC84_0788	1.0485	1.11e-40	phosphoglucomutase/phosphomannomutase family protein	algC	VFG015760(gi:167036324)
	SSUSC84_0367	1.0263	3.23e-61	methionyl-tRNA formyltransferase	wbmU	VFG011178(gi:33594843)
	SSUSC84_1450	1.0015	1.77e-47	mannose-6-phosphate isomerase	manA	VFG016424(gi:118480308)
	SSUSC84_0277	0.96891	0.020216	putative cation-transporting ATPase	ctpV	VFG031404(gi:379747038)
	SSUSC84_0306	0.92898	2.49e-70	putative aminotransferase	clbL	VFG001964(gb|NP_282577)
	SSUSC84_0164	0.90347	1.2e-75	putative surface-anchored protein pseudogene	epf	VFG005557(gi:146317835)
	SSUSC84_1528	0.88079	0.00086639	putative phosphotyrosine protein phosphatase	ptpA	VFG031530(gi:183983299)
	SSUSC84_1645	0.87944	1.92e-06	putative sucrose operon repressor	EFAU004_00405	VFG045670(gi:383327725)
	SSUSC84_0214	0.8791	5.96e-39	peptide methionine sulfoxide reductase	msrA/BpilB	VFG037104(gi:194099662)
	SSUSC84_0428	0.87566	1.18e-56	putative ATP-dependent Clp protease ATP-binding subunit	clpE	VFG000080(gb|NP_464522)
	SSUSC84_1508	0.86472	1.98e-16	ABC transporter ATP-binding protein	hmuV	VFG013715(gi:38233235)
	SSUSC84_1405	0.83159	2.5e-24	putative aminotransferase	Cj1437c	VFG001965(gb|NP_282578)
	SSUSC84_0166	0.82164	3.51e-08	ABC transporter ATP-binding protein	ddrA	VFG023849(gi:315444307)
	SSUSC84_1166	0.81622	1.96e-45	glucose-1-phosphate thymidyl transferase	rmlA	VFG005898(gi:125718225)
	SSUSC84_1047	0.7977	2.49e-17	putative competence associated endonuclease	mf2	VFG005420(gi:50914541)
	SSUSC84_1244	0.79574	9.4e-10	ABC transporter ATP-binding protein	hitC	VFG013573(gi:113460924)
	SSUSC84_0906	0.78053	6.7e-43	putative 5'-nucleotidase		VFG002420(gb|NP_644838)
	SSUSC84_1350	0.777	3.48e-57	enolase	SSU98_1513	VFG043469(gi:146321359)
	SSUSC84_0671	0.74741	2.8e-53	muramidase-released protein precursor 136 kDa surface protein	mrp	VFG005394(gi:146318407)
	SSUSC84_0895	0.73736	7.83e-14	maltose O-acetyltransferase	A1S_0057	VFG037973(gi:126640170)
	SSUSC84_0760	0.72961	2.18e-19	putative NADP-dependent L-serine/L-allo-threonine dehydrogenase	wcbP	VFG026115(gi:206561568)
	SSUSC84_1232	0.70313	1.49e-31	putative glycosyltransferase	ABAYE3812	VFG038034(gi:169797736)
	SSUSC84_1517	0.68803	5.26e-14	phosphopantetheine adenylyltransferase	kdtB	VFG000320(gb|NP_208266)
	SSUSC84_1293	0.68627	1.18e-27	putative oxygen-independent coproporphyrinogen III oxidase	hemN	VFG013626(gi:68249065)
	SSUSC84_1657	0.68513	4.1e-16	putative lipoate-protein ligase A	lplA1	VFG019362(gi:217964969)
	SSUSC84_0611	0.68088	8.81e-37	putative phosphomannomutase	yhxB/manB	VFG013329(gi:148826616)
	SSUSC84_1892	0.6717	7.11e-17	metal-dependent transcriptional regulator	ideR	VFG022679(gi:183982016)
	SSUSC84_0201	0.64699	8.35e-17	putative signal peptidase I 4	sipA	VFG043006(gi:77408620)
	SSUSC84_1165	0.64653	6.79e-23	putative dTDP-4-keto-6-deoxyglucose-3%2C5-epimerase	STER_1223	VFG006032(gi:116627989)
	SSUSC84_1948	0.64501	0.00012493	response regulator protein	virR	VFG012195(gi:18310483)
	SSUSC84_1444	0.63698	0.0014083	ABC-type glycine betaine transport system ATP-binding protein	sugC	VFG030680(gi:126436569)
	SSUSC84_1777	0.63607	1.22e-16	putative phosphatidate cytidylyltransferase	cpsB	VFG002189(gb|NP_816140)
	SSUSC84_1675	0.62241	5.96e-14	ABC transporter ATP-binding protein	ddrA	VFG023852(gi:379755108)
	SSUSC84_1344	0.6183	2.05e-16	putative membrane protein	Rv0205	VFG044071(gi:15607346)
	SSUSC84_1162	0.60668	2.17e-23	dTDP-4-dehydrorhamnose reductase	rfbD	VFG018667(gi:157149997)
	SSUSC84_0916	0.60018	1.46e-16	glucose-1-phosphate adenylyltransferase	cpsY	VFG037965(gi:384141328)
	SSUSC84_1726	0.597	1.77e-11	response regulator protein	letA	VFG010912(gi:54295484)
	SSUSC84_1331	0.59659	2.57e-15	putative esterase	fbpA	VFG022523(gi:333992762)
	SSUSC84_1318	0.59651	6.97e-19	putative methyltransferase	fmt	VFG022483(gi:183983165)
	SSUSC84_1223	0.59646	6.06e-21	sensor histidine kinase	senX3	VFG031721(gi:433645399)
	SSUSC84_1287	0.58732	1.98e-16	UDP-glucose 4-epimerase	galE	VFG016387(gi:42784426)
△sitR VS WT
	SSUSC84_1876	-1.9993	2.5968e-08	putative amidase	gbpB	VFG043596(gi:290579544)
	SSUSC84_0029	-1.076	0.018929	phosphoribosylglycinamide formyltransferase	wbmQ	VFG011184(gi:33594847)
	SSUSC84_0033	-0.95011	0.014408	putative phosphoribosylaminoimidazole carboxylase ATPase subunit	purK
	SSUSC84_0030	-0.93574	1.3877e-06	bifunctional purine biosynthesis protein PurH	purH
	SSUSC84_0032	-0.91976	0.016688	putative phosphoribosylaminoimidazole carboxylase catalytic subunit	purE
	SSUSC84_0028	-0.80021	0.0061037	phosphoribosylformylglycinamidine cyclo-ligase	purM
	SSUSC84_1268	-0.76423	0.013152	putative ferrous iron transport protein A	feoA	VFG045722(gi:289163733)
	SSUSC84_1526	-0.74885	0.020193	Dps-like peroxide resistance protein Dpr	napA	VFG000307(gb|NP_207041)
	SSUSC84_0031	-0.68965	0.00043377	phosphoribosylamine-glycine ligase	purD
	SSUSC84_0906	-0.67696	3.9056e-24	putative 5'-nucleotidase	adsA	VFG002420(gb|NP_644838)
	SSUSC84_1385	-0.64745	2.8442e-13	putative surface-anchored 5'-nucleotidase	adsA	VFG002420(gb|NP_644838)
	SSUSC84_1901	-0.63751	9.1432e-20	putative surface-anchored 2'%2C3'-cyclic-nucleotide 2'-phosphodiesterase	adsA	VFG002420(gb|NP_644838)
△sxvR VS WT
	SSUSC84_0029	-2.32193	6.8041e-07	phosphoribosylglycinamide formyltransferase	purN
	SSUSC84_0028	-1.73697	3.4957e-09	phosphoribosylformylglycinamidine cyclo-ligase	purM
	SSUSC84_0030	-1.55639	1.7184e-14	bifunctional purine biosynthesis protein PurH	purH
	SSUSC84_0027	-1.39593	7.1959e-09	putative amidophosphoribosyltransferase precursor	purF
	SSUSC84_1385	-1.12029	7.2576e-38	putative surface-anchored 5'-nucleotidase	adsA	VFG002420(gb|NP_644838)
	SSUSC84_0701	-0.862496	2.6006e-39	aspartate carbamoyltransferase	argK	VFG015903(gi:71735587)
	SSUSC84_0273	-0.810966	0.0023585	extracellular solute-binding protein	bscS	VFG043099(gi:15802355)
	SSUSC84_0250	-0.810966	3.3412e-36	aldehyde-alcohol dehydrogenase [includes: alcohol dehydrogenase%3B acetaldehyde dehydrogenase]	ddrA	VFG006720(gi:116873066)
	SSUSC84_0032	-0.810966	0.038601	putative phosphoribosylaminoimidazole carboxylase catalytic subunit	purE
	SSUSC84_1782	-0.713119	3.5286e-25	surface-anchored DNA nuclease	ssnA
	SSUSC84_0721	0.584963	2.5127e-20	cell envelope proteinase	scpA/scpB	VFG005475(gi:94995203)
	SSUSC84_0166	0.594549	0.0013503	ABC transporter ATP-binding protein	ddrA	VFG023849(gi:315444307)
	SSUSC84_0900	0.604071	3.455e-08	haemolysin-III related membrane protein	hlyIII	VFG012187(gi:28210321)
	SSUSC84_0666	0.632268	3.1068e-11	ABC transporter ATP-binding protein	ddrA	VFG007914(gi:120404101)
	SSUSC84_1526	0.831877	1.9359e-11	Dps-like peroxide resistance protein Dpr	dpr	VFG000307(gb|NP_207041)
	SSUSC84_1525	0.887525	3.9977e-08	ABC transporter ATP-binding protein	ddrA	VFG007915(gi:126435440)
	SSUSC84_0277	1.75702	1.6075e-09	putative cation-transporting ATPase	ctpV	VFG031404(gi:379747038)
